# Supplementary material for: A Novel EYA1 Mutation Causing Alternative RNA Splicing in a Chinese Family With Branchio-Oto Syndrome: Implications for Molecular Diagnosis and Clinical Application
Source: PubMed Central journal article supplement — Clin Exp Otorhinolaryngol. 2023 Oct 11;16(4):342–58. doi: 10.21053/ceo.2023.00668 (PMC10710918; doi:10.21053/ceo.2023.00668), 2023-10-11
Supplement: ceo-2023-00668-Supplementary-Fig-2.pdf [file ceo-2023-00668-Supplementary-Fig-2.pdf]

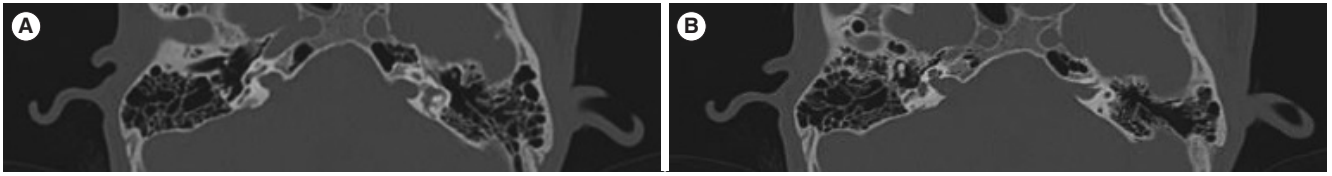

**Supplementary Fig. 2.** Temporal bone high-resolution computed tomography in the proband shows that the bilateral vestibular aqueduct structure was normal. (A) A structural image of the left vestibular aqueduct. (B) A structural image of the right vestibular aqueduct.
