# Supplementary material for: A Novel EYA1 Mutation Causing Alternative RNA Splicing in a Chinese Family With Branchio-Oto Syndrome: Implications for Molecular Diagnosis and Clinical Application
Source: PubMed Central journal article supplement — Clin Exp Otorhinolaryngol. 2023 Oct 11;16(4):342–58. doi: 10.21053/ceo.2023.00668 (PMC10710918; doi:10.21053/ceo.2023.00668), 2023-10-11
Supplement: ceo-2023-00668-Supplementary-Table-1.pdf [file ceo-2023-00668-Supplementary-Table-1.pdf]

Supplementary Table 1. The detailed information of EYA1 NM\_000503.6:c.1050+4A&gt;G

| Data source                         | Category      | Summary                                                                                              |
|-------------------------------------|---------------|------------------------------------------------------------------------------------------------------|
| Population database                 | 1000 Genomes  | -                                                                                                    |
|                                     | ESP6500       | -                                                                                                    |
|                                     | GnomAD        | -                                                                                                    |
|                                     | ExAC          | -                                                                                                    |
| In silicon data                     | CADD          | 2.16                                                                                                 |
|                                     | CADD_Phred    | 17.23                                                                                                |
|                                     | MaxEntScan    | 9.25 (pre-mutation), 7.22 (post-mutation), -21.95% (reduction > 15%)                                 |
|                                     | dbscSNV_SCORE | 0.9995                                                                                               |
|                                     | Spidex        | -35.53                                                                                               |
|                                     | SpliceAI      | 0.58                                                                                                 |
| Variant classification (pathogenic) | PVS1 (RNA)    | The splicing variant was predicted to be deleterious and verified by multiple experimental evidence. |
|                                     | PM2           | The variant has not been reported in the above population databases.                                 |
|                                     | PP1           | The variant co-segregate in family members with HL                                                   |
